# Supplementary material for: Arbuscular Mycorrhizal Fungus Alters Alfalfa (Medicago sativa) Defense Enzyme Activities and Volatile Organic Compound Contents in Response to Pea Aphid (Acyrthosiphon pisum) Infestation
Source: MDPI journal article supplement (doi:10.3390/jof8121308), 2022-12-16
Supplement: s1 [file s1]

**Table S2.** The compounds of 114 VOCs in *Medicago sativa* roots inoculated with *Rhizophagus intraradices* (AM) and infested with *Acyrtosiphon pisum* (A+) or non-inoculated with *R. intraradices* (NM) and non-infested with *A. pisum* (A-).

| ID | Class                 | Compounds                                                                                   |
|----|-----------------------|---------------------------------------------------------------------------------------------|
| 1  | Terpenes              | .gamma.-Terpinene                                                                           |
| 2  | Terpenes              | 1-Cyclohexene-1-carboxaldehyde,<br>2,6,6-trimethyl-<br>1,3-Cyclohexadiene-1-carboxaldehyde, |
| 3  | Terpenes              | 2,6,6-trimethyl-                                                                            |
| 4  | Terpenes              | .beta.-Myrcene                                                                              |
| 5  | Terpenes              | .alpha.-Ionone<br>3-Buten-2-one,                                                            |
| 6  | Terpenes              | 4-(2,2,6-trimethyl-7-oxabicyclo[4.1.0]hept-1-yl)-                                           |
| 7  | Alcohol               | 2-Penten-1-ol, (Z)-                                                                         |
| 8  | Alcohol               | 1-Hexanol                                                                                   |
| 9  | Alcohol               | 1-Octen-3-ol                                                                                |
| 10 | Alcohol               | 2-Octen-1-ol, (E)-                                                                          |
| 11 | Alcohol               | Benzyl alcohol                                                                              |
| 12 | Aromatics             | Phenol, 2-methoxy-                                                                          |
| 13 | Alcohol               | Phenylethyl Alcohol                                                                         |
| 14 | Aromatics             | Naphthalene                                                                                 |
| 15 | Heterocyclic compound | Pyridine                                                                                    |
| 16 | Aldehyde              | 2-Pentenal, (E)-                                                                            |
| 17 | Aldehyde              | Hexanal                                                                                     |
| 18 | Aldehyde              | 2-Hexenal, (E)-                                                                             |
| 19 | Aldehyde              | Benzaldehyde                                                                                |
| 20 | Aldehyde              | 2,4-Heptadienal, (E,E)-                                                                     |
| 21 | Aldehyde              | Benzeneacetaldehyde                                                                         |
| 22 | Aldehyde              | 2-Nonenal, (E)-                                                                             |
| 23 | Aldehyde              | 2,6-Nonadienal, (E,Z)-                                                                      |
| 24 | Aldehyde              | 2,4-Nonadienal, (E,E)-                                                                      |
| 25 | Terpenes              | 2,6-Octadienal, 3,7-dimethyl-, (E)-                                                         |
| 26 | Aldehyde              | Pentadecanal                                                                                |
| 27 | Ketone                | 2-Heptanone                                                                                 |
| 28 | Ketone                | 3-Octanone                                                                                  |
| 29 | Ketone                | 3-Octen-2-one                                                                               |
| 30 | Ketone                | 3,5-Octadien-2-one                                                                          |
| 31 | Alkanes               | Dodecane                                                                                    |
| 32 | Alkanes               | Tridecane                                                                                   |
| 33 | Alkanes               | Tetradecane                                                                                 |
| 34 | Alkanes               | Pentadecane                                                                                 |
| 35 | Alkanes               | Hexadecane                                                                                  |
| 36 | Alkanes               | Heptadecane                                                                                 |
| 37 | Ester                 | Acetic acid, hexyl ester                                                                    |

|    |                       |                                                                                       |
|----|-----------------------|---------------------------------------------------------------------------------------|
| 38 | Ester                 | Octanoic acid, methyl ester                                                           |
| 39 | Ester                 | Heptanoic acid, ethyl ester                                                           |
| 40 | Ester                 | Octanoic acid, ethyl ester                                                            |
| 41 | Ester                 | Methyl salicylate                                                                     |
| 42 | Ester                 | Linalyl acetate                                                                       |
| 43 | Aldehyde              | 2-octenal                                                                             |
| 44 | Terpenes              | (+)-alpha-Pinene                                                                      |
| 45 | Ketone                | 4-Heptanone, 2,6-dimethyl-                                                            |
| 46 | Alcohol               | Cyclohexanol                                                                          |
| 47 | Aromatics             | Benzene, 1,4-diethyl-                                                                 |
| 48 | Ketone                | 5,9-Undecadien-2-one, 6,10-dimethyl-, (Z)-<br>2(4H)-Benzofuranone,                    |
| 49 | Ester                 | 5,6,7,7a-tetrahydro-4,4,7a-trimethyl-, (R)-<br>3-Buten-2-one,                         |
| 50 | Terpenes              | 4-(2,6,6-trimethyl-1-cyclohexen-1-yl)-                                                |
| 51 | Alkanes               | Undecane, 4,6-dimethyl-                                                               |
| 52 | Alkanes               | Dodecane, 4-methyl-                                                                   |
| 53 | Alkanes               | Decane, 2,3,5-trimethyl-                                                              |
| 54 | Alkanes               | 2,4-Dimethyldodecane                                                                  |
| 55 | Alkanes               | Dodecane, 4,6-dimethyl-                                                               |
| 56 | Alkanes               | Tridecane, 2-methyl-                                                                  |
| 57 | Alkanes               | Pentadecane, 2,6,10-trimethyl-                                                        |
| 58 | Alkanes               | 2,6,10-Trimethyltridecane                                                             |
| 59 | Phenol                | Phenol, 3,5-dimethyl-                                                                 |
| 60 | Ketone                | 4-Hexen-3-one, 5-methyl-                                                              |
| 61 | Alkanes               | Decane, 3-ethyl-3-methyl-                                                             |
| 62 | Alcohol               | 3-Methylpenta-1,3-diene-5-ol, (E)-                                                    |
| 63 | Aldehyde              | Benzaldehyde, 3-ethyl-                                                                |
| 64 | Alkanes               | Tetradecane, 4-methyl-                                                                |
| 65 | Aldehyde              | Benzaldehyde, 2,4-dimethyl-                                                           |
| 66 | Alkanes               | Hexadecane, 2,6,11,15-tetramethyl-                                                    |
| 67 | Heterocyclic compound | Furan, 2-hexyl-<br>2-Propenoic acid, 2-methyl-,<br>(tetrahydro-2-furanyl)methyl ester |
| 68 | Ester                 |                                                                                       |
| 69 | Ether                 | 2-Propylphenol, n-propyl ether                                                        |
| 70 | Alcohol               | 10-Methyltricyclo[4.3.1.1(2,5)]undecan-10-ol                                          |
| 71 | Aldehyde              | 2,5-Furandicarboxaldehyde                                                             |
| 72 | Alcohol               | Cyclohexanol, 2,6-dimethyl-                                                           |
| 73 | Alkanes               | Undecane, 6,6-dimethyl-                                                               |
| 74 | Olefin                | Cyclohexene, 4-methyl-1-(1-methylethenyl)-                                            |
| 75 | Alkanes               | 3,5-Dimethyldodecane                                                                  |
| 76 | Alcohol               | (E)-2,6-Dimethylocta-3,7-diene-2,6-diol                                               |
| 77 | Alkanes               | Undecane, 3,4-dimethyl-                                                               |
| 78 | Alkanes               | Undecane, 3,8-dimethyl-                                                               |

|     |                       |                                                                                                        |
|-----|-----------------------|--------------------------------------------------------------------------------------------------------|
| 79  | Alkanes               | Nonane, 5-(2-methylpropyl)-                                                                            |
| 80  | Alkanes               | Dodecane, 5-methyl-                                                                                    |
| 81  | Alcohol               | 2-Ethyl-1-hexanol                                                                                      |
| 82  | Ester                 | Ethyl 4-(ethyloxy)-2-oxobut-3-enoate                                                                   |
| 83  | Ketone                | Cyclobutanone, 2,2,3-trimethyl-                                                                        |
| 84  | Aromatics             | Naphthalene, 2-methyl-                                                                                 |
| 85  | Heterocyclic compound | 1H-1,2,4-Triazol-3-amine, 5-methyl-                                                                    |
| 86  | Ester                 | Butanedioic acid, methyl-, dimethyl ester                                                              |
| 87  | Aldehyde              | Benzaldehyde, 2,5-dimethyl-                                                                            |
| 88  | Terpenes              | Cyclohexanol, 1-methyl-4-(1-methylethylidene)-                                                         |
| 89  | Alcohol               | 6-Octen-1-ol, 3,7-dimethyl-, (R)-                                                                      |
| 90  | Phenol                | Phenol, 4-(1-methylpropyl)-                                                                            |
| 91  | Heterocyclic compound | Precocene I                                                                                            |
| 92  | Ester                 | Phenol, 2-methoxy-4-(2-propenyl)-, acetate                                                             |
| 93  | Phenol                | Phenol, 4-hexyl-                                                                                       |
| 94  | Ketone                | 2H-Pyran-2-one, 6-pentyl-                                                                              |
| 95  | Ester                 | Acetic acid, 2-ethylhexyl ester                                                                        |
| 96  | Aldehyde              | 4-Heptenal                                                                                             |
| 97  | Terpenes              | (-)-delta.-Panasinsine                                                                                 |
| 98  | Ketone                | 1-Hepten-6-one, 2-methyl-                                                                              |
| 99  | Terpenes              | 2,6-Dimethyl-2-trans-6-octadiene                                                                       |
| 100 | Ketone                | 1-Decen-3-one                                                                                          |
| 101 | Terpenes              | 1, 1, 5-Trimethyl-1, 2-dihydronaphthalene                                                              |
| 102 | Aldehyde              | Cyclohexanecarboxaldehyde                                                                              |
| 103 | Ester                 | Formic acid, octyl ester                                                                               |
| 104 | Ketone                | 1H-Pyrrole-2,5-dione, 3-ethenyl-4-methyl-<br>2-Butenoic acid, 2-methyl-, 2-methylpropyl ester,<br>(E)- |
| 105 | Ester                 | (E)-                                                                                                   |
| 106 | Heterocyclic compound | Oxetane, 3-(1-methylethyl)-                                                                            |
| 107 | Ketone                | 3,4-Hexanedione                                                                                        |
| 108 | Heterocyclic compound | Thieno[2,3-b]thiophene,2-methyl-                                                                       |
| 109 | Ketone                | 2'-Ethoxyacetophenone                                                                                  |
| 110 | Ester                 | Octanoic acid, 3-hexenyl ester, (Z)-                                                                   |
| 111 | Heterocyclic compound | Thiophene, 2-butyl-5-ethyl-                                                                            |
| 112 | Ketone                | 5'-Hydroxy-2',3',4'-trimethylacetophenone                                                              |
| 113 | Aldehyde              | 2-Isopropyl-5-methylhex-2-enal                                                                         |
| 114 | Ester                 | 3-Hexen-1-ol, acetate, (E)-                                                                            |

---
