# Supplementary material for: Arbuscular Mycorrhizal Fungus Alters Alfalfa (Medicago sativa) Defense Enzyme Activities and Volatile Organic Compound Contents in Response to Pea Aphid (Acyrthosiphon pisum) Infestation
Source: MDPI journal article supplement (doi:10.3390/jof8121308), 2022-12-16
Supplement: s1 [file s1]

**Table S1.** Main effects of AM fungus (inoculation or uninoculation), pea aphid (infested or uninfested) and their two way interactions on AM colonization, Shoot fresh weight, Shoot dry weight, Shoot total N, Shoot total P, PPO, CAT, POD, SOD, SA, JA, ABA, NO, Trypsin inhibitor, Total phenols, Total VOCs.  $P < 0.05$  are highlighted in bold.

|                    | AM fungus |         |               | Aphid |         |               | AM fungus*Aphid |        |               |
|--------------------|-----------|---------|---------------|-------|---------|---------------|-----------------|--------|---------------|
|                    | DF        | F       | P             | DF    | F       | P             | DF              | F      | P             |
| AM colonization    | 1         | 561.800 | <b>0.0001</b> | 1     | 0.200   | 0.6627        | 3               | 0.200  | 0.6627        |
| Shoot fresh weight | 1         | 12.344  | <b>0.0043</b> | 1     | 1.013   | 0.3341        | 3               | 0.012  | 0.9137        |
| Shoot dry weight   | 1         | 8.034   | <b>0.0151</b> | 1     | 0.975   | 0.3429        | 3               | 0.015  | 0.9044        |
| Shoot total N      | 1         | 9.941   | <b>0.0083</b> | 1     | 5.420   | <b>0.0382</b> | 3               | 0.316  | 0.5847        |
| Shoot total P      | 1         | 6.431   | <b>0.0261</b> | 1     | 5.412   | <b>0.0383</b> | 3               | 5.479  | <b>0.0373</b> |
| PPO                | 1         | 3.495   | 0.1063        | 1     | 114.903 | <b>0.0001</b> | 3               | 11.444 | <b>0.0054</b> |
| CAT                | 1         | 2.692   | 0.1268        | 1     | 0.130   | 0.7252        | 3               | 6.020  | <b>0.0304</b> |
| POD                | 1         | 0.150   | 0.7052        | 1     | 12.082  | <b>0.0046</b> | 3               | 0.923  | 0.3556        |
| SOD                | 1         | 2.880   | 0.1154        | 1     | 0.102   | 0.7552        | 3               | 0.623  | 0.4452        |
| SA                 | 1         | 5.749   | <b>0.0337</b> | 1     | 0.548   | 0.4735        | 3               | 0.028  | 0.8696        |
| JA                 | 1         | 2.948   | 0.1116        | 1     | 5.758   | <b>0.0335</b> | 3               | 0.014  | 0.9086        |
| ABA                | 1         | 0.204   | 0.6594        | 1     | 1.213   | 0.2923        | 3               | 0.204  | 0.6594        |
| NO                 | 1         | 2.111   | 0.1719        | 1     | 2.741   | 0.1237        | 3               | 0.917  | 0.3573        |
| Trypsin inhibitor  | 1         | 7.596   | <b>0.0174</b> | 1     | 6.130   | <b>0.0292</b> | 3               | 0.369  | 0.5550        |
| Total phenols      | 1         | 0.354   | 0.5629        | 1     | 0.001   | 0.9727        | 3               | 0.828  | 0.3807        |
| Total VOCs         | 1         | 6.091   | <b>0.0296</b> | 1     | 2.196   | 0.1641        | 3               | 0.208  | 0.6569        |
