# Supplementary material for: Arbuscular Mycorrhizal Fungus Alters Alfalfa (Medicago sativa) Defense Enzyme Activities and Volatile Organic Compound Contents in Response to Pea Aphid (Acyrthosiphon pisum) Infestation
Source: MDPI journal article supplement (doi:10.3390/jof8121308), 2022-12-16
Supplement: s1 [file s1]

**Table S3.** Methyl salicylate related differentially expressed genes in NMA+ vs AMA+

| <b>Gene_ID</b> | <b>log2FC</b> | <b><i>P</i><sub>adjust</sub></b> | <b>regulated</b> |
|----------------|---------------|----------------------------------|------------------|
| MS.gene002309  | 2.640         | 0.01827                          | up               |
| MS.gene002329  | 7.336         | 0.00729                          | up               |
| MS.gene003889  | 7.806         | 1.9E-06                          | up               |
| MS.gene006713  | 3.279         | 0.04206                          | up               |
| MS.gene012415  | 8.548         | 0.00137                          | up               |
| MS.gene032992  | 5.914         | 0.00429                          | up               |
| MS.gene036189  | 7.624         | 0.0023                           | up               |
| MS.gene055127  | 2.998         | 0.00453                          | up               |
| MS.gene074385  | 2.924         | 0.03468                          | up               |
| MS.gene23374   | 3.165         | 0.03496                          | up               |
| MS.gene23894   | 11.221        | 5.7E-08                          | up               |
| MS.gene33297   | -4.315        | 0.0002                           | down             |
| MS.gene34096   | -7.795        | 0.03628                          | down             |
| MS.gene43046   | 7.952         | 0.00562                          | up               |
| MS.gene46289   | 6.637         | 0.04629                          | up               |
| MS.gene47360   | 4.565         | 0.01492                          | up               |
| MS.gene48828   | -7.082        | 0.01211                          | down             |
| MS.gene55264   | 7.325         | 0.01727                          | up               |
| MS.gene75923   | -7.648        | 0.00398                          | down             |
| MS.gene81660   | -6.795        | 0.01766                          | down             |
| MS.gene81663   | -6.795        | 0.01766                          | down             |
| MS.gene81658   | -6.795        | 0.01766                          | down             |
