# Supplementary material for: Arbuscular Mycorrhizal Fungus Alters Alfalfa (Medicago sativa) Defense Enzyme Activities and Volatile Organic Compound Contents in Response to Pea Aphid (Acyrthosiphon pisum) Infestation
Source: MDPI journal article supplement (doi:10.3390/jof8121308), 2022-12-16
Supplement: s1 [file s1]

**Table S4.** Methyl salicylate related differentially expressed genes in NMA- vs NMA+

| <b>Gene_ID</b> | <b>log2FC</b> | <b>Padjust</b> | <b>regulated</b> |
|----------------|---------------|----------------|------------------|
| MS.gene003889  | -7.193        | 0.02831        | down             |
| MS.gene012415  | -8.877        | 0.00012        | down             |
| MS.gene23894   | -9.313        | 0.04348        | down             |
